# Supplementary material
Source: PubMed Central journal article supplement (PMC6174361)
Supplement: mmc1.pdf [file mmc1.pdf]

**Supplemental Data**

**Bi-allelic Loss-of-Function Variants**

**in *DNMBP* Cause Infantile Cataracts**

**Muhammad Ansar, Hyung-lok Chung, Rachel L. Taylor, Aamir Nazir, Samina Imtiaz, Muhammad T. Sarwar, Alkistis Manousopoulou, Periklis Makrythanasis, Sondas Saeed, Emilie Falconnet, Michel Guipponi, Constantin J. Pournaras, Maqsood A. Ansari, Emmanuelle Ranza, Federico A. Santoni, Jawad Ahmed, Inayat Shah, Khitab Gul, Graeme CM. Black, Hugo J. Bellen, and Stylianos E. Antonarakis**

## Supplemental Materials

**Figure S1: In situ hybridization showing DNMBP expression in lens**

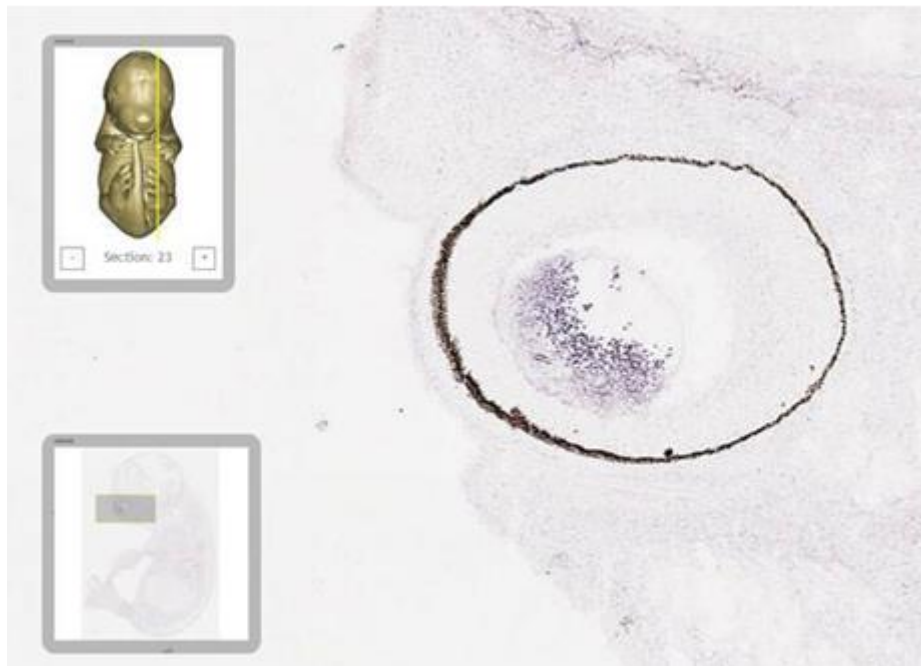

**Figure S1:** In situ hybridization showed that DNMBP is exclusively expressed and localized in lens of E14.5 mice. This figure is taken and modified from our previous collaborative study Eurexpress (<http://www.eurexpress.org>)<sup>1</sup>

**Figure S2: Chromatograms showing the segregation of found variants in DNMBP**

**Family F372**

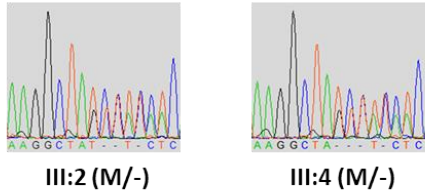

**M:** DNMBP: NM\_015221:c.2947\_2948del; p.(Asp983Ter)

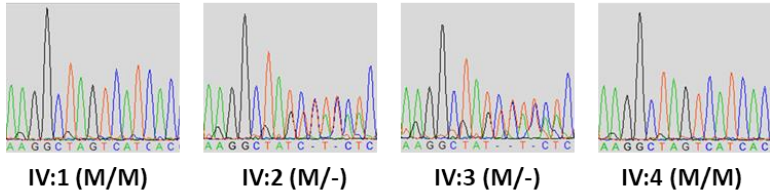

**Family F385**

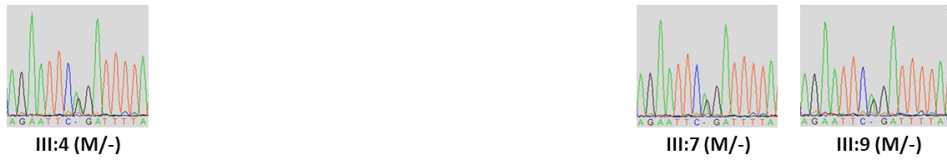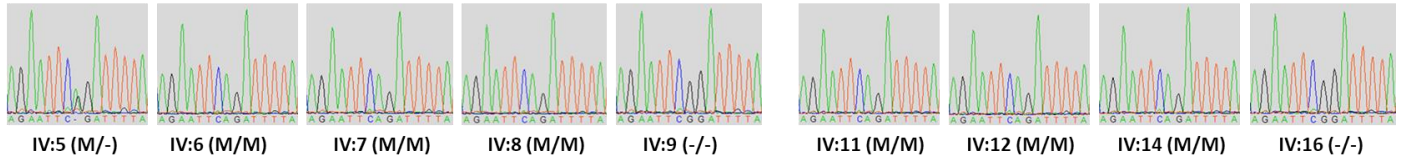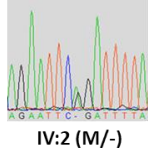

**M:** DNMBP: NM\_015221:c.811C>T;p.(Arg271Ter)

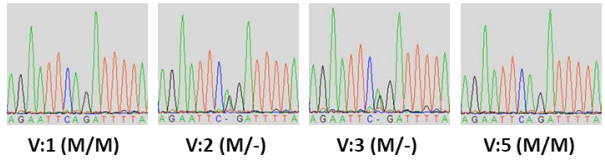

**Family F3**

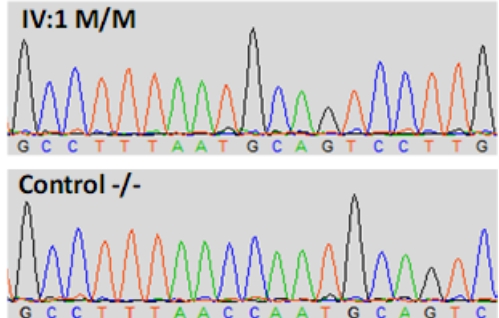

**M:** DNMBP: NM\_015221:c.2852\_2855del; p.(Thr951Metfs\*41)

**Figure S2:** Chromatograms of all the available individuals from families F372 and F385 and F3 showing the segregation of DNMBP variants in the families.

**Supplemental References:**

1. Diez-Roux, G., Banfi, S., Sultan, M., Geffers, L., Anand, S., Rozado, D., Magen, A., Canidio, E., Pagani, M., Peluso, I., et al. (2011). A high-resolution anatomical atlas of the transcriptome in the mouse embryo. *PLoS Biol* 9, e1000582.
